# Supplementary material
Source: PubMed Central journal article supplement (PMC387385)

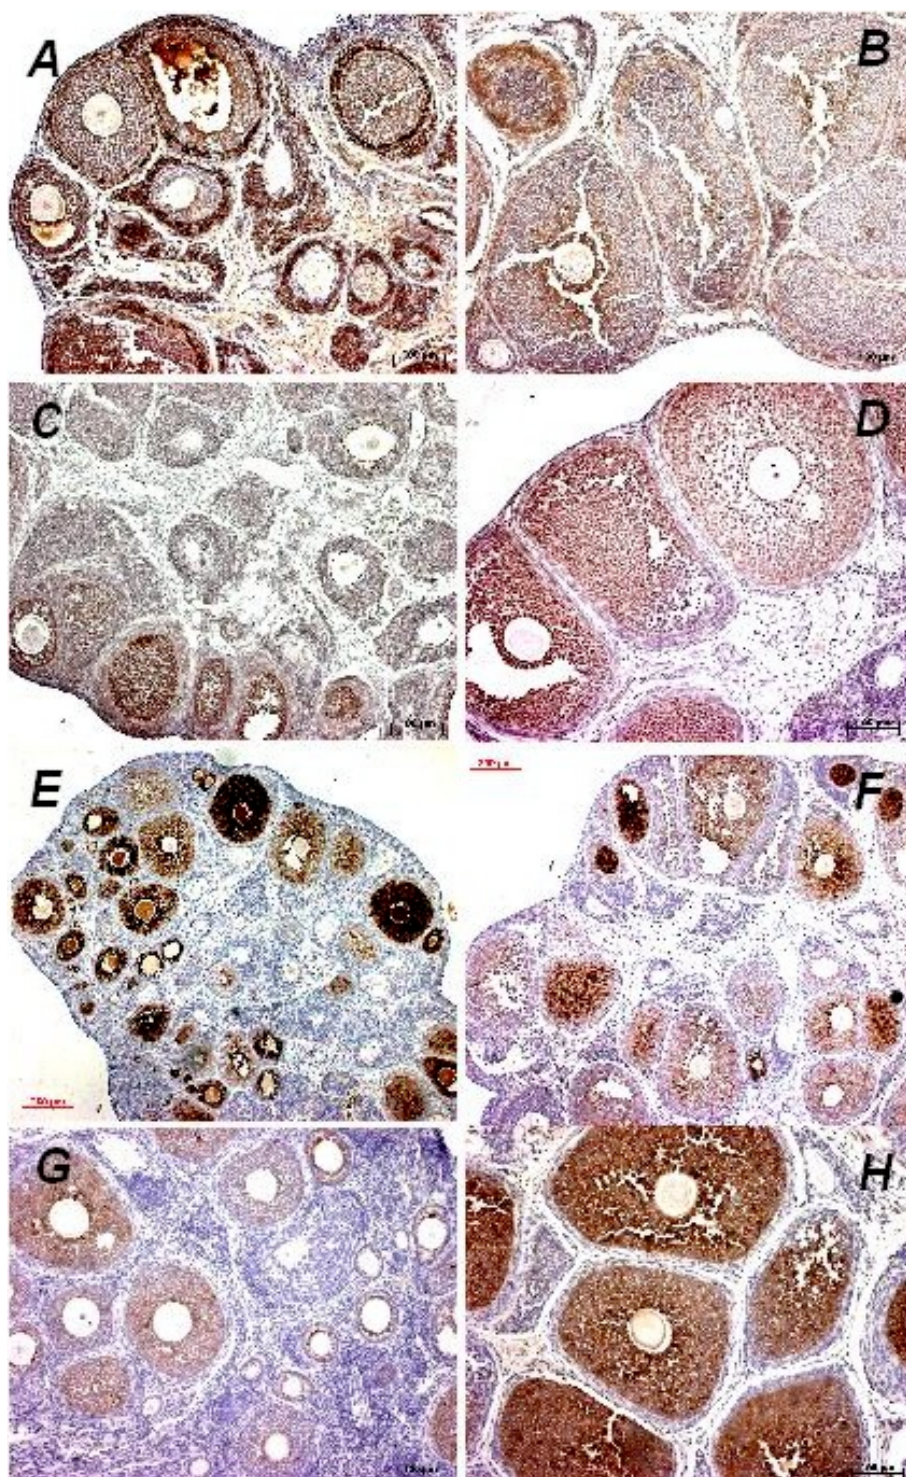

Supplement: pnas_101_14_5129__3.pdf [file pnas_101_14_5129__3.pdf]
